# Supplementary material
Source: publisher site journal article supplement (http://www.degruyter.com/publication/journal_key/CHEM/downloadAsset/CHEM_CFP_Marine%20environmental%20sciences.pdf)
Supplement: Supplementary file 1 [file CHEM_CFP_Marine%20environmental%20sciences.pdf]

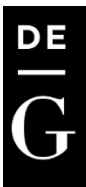

DE GRUYTER

## Marine environmental sciences and significance of the multidisciplinary approaches for assessing pollutions, remedies, and predictions

### GUEST EDITOR

**Dr. Yasar Nellyot Kavil**, Stockholm Convention Regional Center of Capacity-Building and the Transfer of Technology for West Asia (SCRC-Kuwait)/ King Abdulaziz University, Saudi Arabia

### DESCRIPTION

Marine Environmental Science is a vast topic and it is not limited to one subject. This is a multidisciplinary science with the connections of Chemistry, Physics, Biology, Geology, and Environmental Sciences. Around 70% of the earth's surface is covered by water bodies and it is a scientifically least explored region. It regulates the Earth's climate, plays an important role in the hydrological cycle, supports a large portion of the planet's biodiversity, provides food and mineral resources, serves as a vital means of national defence, provides a low-cost mode of transportation, and is the final destination for many waste products. This proposed Special Issue will discuss the anthropogenic and insitu contamination along with the marine environment. Since most of the project will discuss the level of pollutant, source, and its cycling within the marine diversities. However, this project is not limited to those aspects. It extends to the various remedy approaches of this pollution (Organic/Inorganic/Metal etc.) and the different modeling aspects for predicting the environmental pollution and different mode of transport.

### KEYWORDS

- marine environmental pollution
- remedies for aquatic pollution and marine environment deterioration
- biogeochemistry
- biogeochemical modelling and ocean modelling
- emerging pollutants in aquatic environment
- marine geochemistry and metal speciation
- nutrient cycling and behaviour of dissolved oxygen

**Submission deadline: 31.08.2024**

### HOW TO SUBMIT

The authors are kindly invited to register at our [paper processing system](#) and submit their contribution (both original papers or reviews are welcome) using a special track established for this special issue (Section/Category – "Special Issue on marine environmental sciences and significance of the multidisciplinary approaches").

All manuscripts will undergo the standard peer-review process (single-blind, at least two independent reviewers) and will be treated in the same way as other regular articles (indexing, abstracting, immediate publication, etc.). Instructions for authors are available [here](#).

In case of any questions please contact Open Chemistry Managing Editor:  
Małgorzata Komadowska ([openchemistry@degruyter.com](mailto:openchemistry@degruyter.com)).

[degruyter.com/chem](https://degruyter.com/chem)
